# Supplementary material
Source: Elsevier journal article supplement (https://www.sciencedirect.com/science/article/pii/S0300893224005219)

## MATERIAL ADICIONAL

**Tabla 1 del material adicional**

Características de los pacientes con y sin antecedentes de fibrilación o *flutter* auricular

|                                                | Antecedente de<br>FA/FIA<br>(n = 79) | Sin antecedente<br>de FA/FIA<br>(n = 941) | p       |
|------------------------------------------------|--------------------------------------|-------------------------------------------|---------|
| <b>Características basales</b>                 |                                      |                                           |         |
| <i>Edad (años)</i>                             | 75,56 ± 9,6                          | 66,08 ± 12,6                              | < 0,001 |
| <i>Edad ≥ 75 años</i>                          | 47 (59,5)                            | 245 (26,0)                                | < 0,001 |
| <i>Índice de masa corporal</i>                 | 27,69 ± 4,5                          | 27,70 ± 4,6                               | 0,979   |
| <i>Mujeres</i>                                 | 20 (25,3)                            | 220 (23,4)                                | 0,697   |
| <i>Hipertensión arterial</i>                   | 68 (86,1)                            | 636 (67,6)                                | 0,001   |
| <i>Dislipemia</i>                              | 61 (77,2)                            | 593 (63,0)                                | 0,012   |
| <i>Diabetes</i>                                | 33 (41,8)                            | 320 (34,0)                                | 0,163   |
| <i>Tabaquismo</i>                              | 46 (58,2)                            | 579 (61,5)                                | 0,563   |
| <i>Insuficiencia cardiaca</i>                  | 15 (19,0)                            | 27 (2,9)                                  | < 0,001 |
| Clase funcional NYHA > I                       | 14 (17,7)                            | 22 (2,3)                                  | 0,239   |
| Fracción de eyección previa reducida           | 5 (6,3)                              | 9 (0,1)                                   | 0,669   |
| <i>Cardiopatía isquémica previa</i>            |                                      |                                           |         |
| Infarto de miocardio                           | 37 (46,8)                            | 198 (21,0)                                | < 0,001 |
| Revascularización percutánea                   | 33 (41,8)                            | 212 (22,5)                                | < 0,001 |
| Cirugía de revascularización                   | 10 (12,7)                            | 40 (4,3)                                  | 0,001   |
| <i>Enfermedad vascular periférica</i>          | 11 (13,9)                            | 96 (10,2)                                 | 0,301   |
| <i>Ictus/accidente isquémico transitorio</i>   | 12 (15,2)                            | 58 (6,2)                                  | 0,002   |
| <i>Enfermedad renal crónica</i>                | 20 (25,6)                            | 100 (10,6)                                | < 0,001 |
| <i>Enfermedad pulmonar obstructiva crónica</i> | 13 (16,5)                            | 90 (9,6)                                  | 0,052   |
| <i>Hemorragia previa</i>                       | 4 (5,1)                              | 17 (1,9)                                  | 0,073   |
| <i>Demencia</i>                                | 1 (1,3)                              | 20 (2,1)                                  | 0,605   |
| <i>Abuso de alcohol/otras drogas</i>           | 4 (5,1)                              | 65 (6,9)                                  | 0,529   |

|                                                         |                             |                            |                  |
|---------------------------------------------------------|-----------------------------|----------------------------|------------------|
| <i>Escala FRAIL</i>                                     | 1,03 ± 1,2                  | 0,63 ± 1,0                 | 0,002            |
| <b>Presentación clínica</b>                             |                             |                            |                  |
| <i>IAMSEST al ingreso</i>                               | 62 (78,5)                   | 722 (76,8)                 | 0,735            |
| <i>Parada cardiaca antes de la coronariografía</i>      | 0                           | 4 (0,4)                    | 0,999            |
| <i>Arritmia ventricular antes de la coronariografía</i> | 0                           | 5 (0,5)                    | 0,999            |
| <i>Angina refractaria</i>                               | 3 (3,8)                     | 28 (3,0)                   | 0,726            |
| <i>Killip-Kimball III-IV</i>                            | 4 (5,1)                     | 23 (2,4)                   | 0,164            |
| <i>Cambios electrocardiográficos de isquemia</i>        | 40 (50,6)                   | 479 (50,9)                 | 0,963            |
| <b>Tratamiento antitrombótico inicial</b>               |                             |                            |                  |
| <i>AAS antes de la coronariografía</i>                  | 74 (93,7)                   | 932 (99,0)                 | < 0,001          |
| <i>iP2Y<sub>12</sub> antes de la coronariografía</i>    |                             |                            | < 0,001          |
| Clpidogrel                                              | 45 (88,2)                   | 286 (43,3)                 |                  |
| Prasugrel                                               | 3 (5,9)                     | 18 (2,7)                   |                  |
| Ticagrelor                                              | 3 (5,9)                     | 357 (54,0)                 |                  |
| <i>Pretratamiento antiagregante plaquetario doble</i>   | 51 (64,0)                   | 661 (70,4)                 | 0,035            |
| <i>Pretratamiento anticoagulante</i>                    |                             |                            | < 0,001          |
| Fondaparinux                                            | 12 (24,0)                   | 411 (57,3)                 |                  |
| Heparina de bajo peso molecular                         | 36 (72,0)                   | 290 (40,4)                 |                  |
| Heparina no fraccionada                                 | 2 (4,0)                     | 16 (2,2)                   |                  |
| No                                                      | 29 (32,4)                   | 224 (23,6)                 |                  |
| <b>Tratamiento invasivo</b>                             |                             |                            |                  |
| <i>Tiempo hasta la coronariografía &gt; 72 h</i>        | 118,94 ± 491,8<br>29 (36,7) | 55,87 ± 67,1<br>238 (25,2) | < 0,001<br>0,049 |
| <i>Test invasivos previos a la coronariografía</i>      | 1 (1,3)                     | 82 (8,7)                   | 0,016            |
| <i>Acceso femoral</i>                                   | 7 (8,9)                     | 46 (4,9)                   | 0,127            |
| <i>Revascularización</i>                                | 64 (81,0)                   | 870 (92,7)                 | < 0,001          |

|                   |           |            |       |
|-------------------|-----------|------------|-------|
| <i>Quirúrgica</i> | 5 (6,3)   | 94 (10,0)  | 0,291 |
| <i>Percutánea</i> | 59 (74,7) | 778 (82,7) | 0,075 |

FA: fibrilación auricular; FIA: *flutter* auricular; IAMSEST: Infarto agudo de miocardio sin elevación del segmento ST; iP2Y<sub>12</sub>: inhibidores de iP2Y<sub>12</sub>; NYHA: *New York Heart Association*.

Los valores expresan n (%) o media ± desviación estándar.

**Tabla 2 del material adicional**

Datos angiográficos

|                                              | IMPACT<br>TIMING-<br>GO<br>(n =<br>1.020) | FA/FIA<br>previos<br>(n = 79) | FA/FIA<br>durante el<br>ingreso<br>(n = 37) | Sin FA/FIA<br>(n = 904) | p     |
|----------------------------------------------|-------------------------------------------|-------------------------------|---------------------------------------------|-------------------------|-------|
| <i>Principal arteria afectada</i>            |                                           |                               |                                             |                         | 0,106 |
| Descendente anterior                         | 471 (46,8)                                | 26 (33,3)                     | 18 (52,9)                                   | 427 (47,8)              |       |
| Circunfleja                                  | 230 (22,9)                                | 18 (23,1)                     | 7 (20,6)                                    | 205 (22,9)              |       |
| Coronaria derecha                            | 248 (24,7)                                | 28 (35,9)                     | 6 (17,6)                                    | 214 (23,9)              |       |
| <i>Bypass</i>                                | 16 (1,6)                                  | 0                             | 1 (2,9)                                     | 15 (1,7)                |       |
| Otra                                         | 41 (4,1)                                  | 6 (7,7)                       | 2 (5,6)                                     | 33 (3,7)                |       |
| <i>Flujo TIMI basal</i>                      |                                           |                               |                                             |                         | 0,602 |
| 0                                            | 105 (10,4)                                | 9 (11,5)                      | 2 (5,6)                                     | 94 (10,5)               |       |
| I                                            | 73 (7,2)                                  | 8 (10,3)                      | 2 (5,6)                                     | 63 (7,0)                |       |
| II                                           | 125 (12,3)                                | 13 (16,7)                     | 4 (11,1)                                    | 108 (12,0)              |       |
| III                                          | 710 (70,1)                                | 48 (61,8)                     | 28 (77,8)                                   | 634 (70,5)              |       |
| <i>Presencia de oclusión crónica</i>         | 151 (15,0)                                | 19 (24,4)                     | 11 (30,6)                                   | 121 (13,5)              | 0,001 |
| <i>Intervención coronaria<br/>percutánea</i> |                                           |                               |                                             |                         | 0,897 |
| Tromboaspiración                             | 39 (4,7)                                  | 2 (2,5)                       | 1 (2,7)                                     | 36 (3,9)                |       |
| <i>No reflow</i>                             | 26 (3,2)                                  | 1 (1,3)                       | 1 (2,7)                                     | 24 (2,7)                | 0,750 |

FA/FIA: fibrilación auricular o *flutter* auricular; TIMI: *Thrombolysis In Myocardial Infarction*.  
Los valores expresan n (%).

### Tabla 3 del material adicional

Modelo de regresión con las variables asociadas con la aparición durante el ingreso de arritmias supraventriculares de potencial tromboembólico

| Variable                                               | OR bruta<br>(IC95%) | p       | OR ajustada<br>(IC95%) | p       |
|--------------------------------------------------------|---------------------|---------|------------------------|---------|
| Edad > 75 años                                         | 4,48 (2,28-8,78)    | < 0,001 | 3,23(1,42-7,35)        | 0,003   |
| Fragilidad                                             | 2,44 (1,24-4,77)    | 0,009   | 1,54 (0,68-3,47)       | 0,070   |
| Diabetes mellitus                                      | 2,58 (1,67-4,00)    | < 0,001 | 1,40 (0,58-2,83)       | 0,462   |
| Insuficiencia cardiaca                                 | 3,24 (0,93-11,27)   | 0,065   | 1,08 (0,16-3,91)       | 0,772   |
| Infarto agudo de miocardio previo                      | 1,85 (0,91-3,76)    | 0,077   | 0,73 (0,31-1,76)       | 0,488   |
| Insuficiencia renal crónica                            | 4,45 (2,16-9,17)    | < 0,001 | 2,96 (1,20-7,32)       | 0,019   |
| Enfermedad cerebrovascular                             | 4,07 (1,94-8,53)    | < 0,001 | 2,20 (0,88-5,50)       | 0,102   |
| Killip-Kimbal > I al ingreso                           | 1,23 (1,03-1,89)    | 0,047   | 1,00 (0,18-5,52)       | 0,998   |
| PCR o arritmia ventricular previa a la coronariografía | 12,85 (2,28-72,57)  | 0,004   | 16,44 (2,24-106,11)    | 0,003   |
| Revascularización quirúrgica                           | 6,21 (2,94-13,14)   | < 0,001 | 10,81 (4,51-25,93)     | < 0,001 |

OR: *odds ratio*; PCR: parada cardiorrespiratoria.

#### Tabla 4 del material adicional

Diferencias en la tasa de eventos hospitalarios

|                                                 | IMPACT<br>TIMING-GO<br>(n = 1.020) | FA/FIA antes<br>o durante el<br>ingreso<br>(n = 116) | Sin FA/FIA<br>(n = 904) | p          |
|-------------------------------------------------|------------------------------------|------------------------------------------------------|-------------------------|------------|
| Estancia hospitalaria<br>(días)                 | 7,74 ± 10,24                       | 12,5 ± 13,1                                          | 7,1 ± 9,6               | <<br>0,001 |
| Combinado de<br>complicaciones<br>hospitalarias | 90 (8,8)                           | 33 (28,4)                                            | 58 (6,3)                | <<br>0,001 |
| Insuficiencia renal                             | 54 (5,3)                           | 9 (11,4)                                             | 34 (3,8)                | <<br>0,001 |
| Arritmia ventricular                            | 7 (0,7)                            | 1 (1,3)                                              | 3 (0,3%)                | 0,004      |
| Complicación mecánica                           | 1 (0,1)                            | 0                                                    | 1 (0,1)                 | 0,999      |
| Delirio                                         | 18 (1,8)                           | 5 (6,3)                                              | 8 (0,9)                 | <0,001     |
| Implante de marcapasos<br>definitivo            | 2 (0,2)                            | 1 (1,3)                                              | 1 (0,1)                 | 0,215      |
| Sangrado grave                                  | 35 (3,4)                           | 7 (8,9)                                              | 20 (2,2)                | <<br>0,001 |
| Reinfarto                                       | 6 (0,6)                            | 1 (1,3)                                              | 5 (0,6)                 | 0,516      |
| Mortalidad (%)                                  | 9 (0,9)                            | 2 (2,5)                                              | 5 (0,5)                 | 0,013      |

FA/FIA: fibrilación auricular o *flutter* auricular.

Los valores expresan n (%) o media ± desviación estándar.

**Tabla 5 del material adicional**

Modelo multivariado para el evento principal hospitalario

| Variable                                      | OR bruta (IC95%)   | p       | OR ajustada (IC95%) | p       |
|-----------------------------------------------|--------------------|---------|---------------------|---------|
| FA/FIA previo frente a sin FA/FIA             | 3,70 (2,01-6,82)   | < 0,001 | 1,70 (0,91-3,58)    | 0,161   |
| FA/FIA durante el ingreso frente a sin FA/FIA | 12,40 (6,16-24,95) | < 0,001 | 5,12 (2,30-11,43)   | < 0,001 |
| Edad (por año)                                | 1,05 (1,03-1,08)   | < 0,001 | 1,03 (1,01-1,05)    | 0,024   |
| Sexo masculino                                | 0,71 (0,44-1,13)   | 0,150   |                     |         |
| IMC (por cada punto)                          | 1,04 (1,00-1,09)   | 0,050   |                     |         |
| Hipertensión arterial                         | 3,20 (1,72-5,97)   | < 0,001 | 1,58 (0,78-3,19)    | 0,201   |
| Dislipemia                                    | 1,36 (0,85-2,18)   | 0,197   |                     |         |
| Tabaquismo                                    | 1,21               |         |                     |         |
| Diabetes                                      | 2,52 (1,63-3,89)   | < 0,001 | 1,24 (0,74-2,08)    | 0,431   |
| Infarto de miocardio previo                   | 1,55 (0,97-2,48)   | 0,068   |                     |         |
| Insuficiencia cardiaca                        | 2,13 (0,92-4,94)   | 0,079   |                     |         |
| Vasculopatía periférica                       | 1,79 (0,99-3,25)   | 0,054   |                     |         |
| Enfermedad cerebrovascular                    | 2,54 (1,33-4,84)   | 0,005   | 1,46 (0,65-3,23)    | 0,351   |
| Enfermedad renal crónica                      | 4,96 (3,05-8,07)   | < 0,001 | 2,69 (1,50-4,86)    | 0,001   |
| Enfermedad pulmonar crónica                   | 1,25 (0,64-2,43)   | 0,517   |                     |         |
| Cáncer previo                                 | 1,14 (0,59-2,21)   | 0,699   |                     |         |
| Demencia                                      | 1,73 (0,49-5,97)   | 0,389   |                     |         |
| Hemorragia grave previa                       | 1,72 (0,50-5,97)   | 0,390   |                     |         |

|                                                                  |                   |         |                  |         |
|------------------------------------------------------------------|-------------------|---------|------------------|---------|
| Situación de fragilidad o prefragilidad                          | 2,47 (1,58-3,85)  | < 0,001 | 1,25 (0,74-2,13) | 0,412   |
| IAMSEST al ingreso                                               | 2,93 (1,45-5,93)  | 0,003   | 2,59 (1,19-2,13) | 0,016   |
| Elevación transitoria del segmento ST                            | 1,10 (0,53-2,27)  | 0,794   |                  |         |
| PCR o arritmia ventricular sostenida previa a la coronariografía | 5,20 (0,94-28,77) | 0,059   |                  |         |
| Killip-Kimball > I al ingreso                                    | 6,60 (4,07-10,72) | < 0,001 | 2,67 (1,48-4,79) | < 0,001 |
| Tiempo hasta la coronariografía (por cada hora)                  | 0,99 (0,99-1,01)  | 0,214   |                  |         |
| Pretratamiento con doble antiagregación                          | 1,23 (0,75-1,99)  | 0,414   |                  |         |
| Acceso femoral en la coronariografía                             | 4,63 (2,44-8,79)  | < 0,001 | 2,70 (1,20-6,05) | 0,016   |
| Revascularización quirúrgica durante el ingreso                  | 3,04 (1,77-5,22)  | < 0,001 | 4,02 (2,13-7,63) | < 0,001 |

FA/FIA: fibrilación auricular o *flutter* auricular; OR: *odds ratio*.



**Tabla 6 del material adicional**

Tratamiento médico al alta

|                                      | FA/FIA<br>previos<br>(n = 77) | FA/FIA durante el<br>ingreso<br>(n = 35) | Sin FA/FIA<br>(n = 899) | p      |
|--------------------------------------|-------------------------------|------------------------------------------|-------------------------|--------|
| Bloqueador beta                      | 58 (75,6)                     | 28 (79,4)                                | 617 (68,6)              | 0,185  |
| IECA/ARA-II                          | 51 (66,2)                     | 20 (57,1)                                | 632 (70,3)              | 0,192  |
| Antialdosterónicos                   | 10 (13,0)                     | 3 (8,6)                                  | 53 (5,9)                | 0,048  |
| Sacubitrilo-valsartán                | 4 (5,2)                       | 3 (9,1)                                  | 27 (3,1)                | 0,096  |
| Amiodarona                           | 5 (6,5)                       | 9 (25,7)                                 | 3 (0,3)                 | <0,001 |
| Digoxina                             | 4 (5,2)                       | 1 (2,9)                                  | 0 (0,0)                 | 0,002  |
| Diurético del asa                    | 32 (42,6)                     | 16 (45,7)                                | 106 (11,8)              | <0,001 |
| Diurético tiacídico                  | 7 (9,3)                       | 4 (11,4)                                 | 98 (10,9)               | 0,905  |
| Estatinas                            | 74 (96,1)                     | 35 (100)                                 | 874 (97,2)              | 0,507  |
| Ezetimiba                            | 28 (36,2)                     | 10 (28,6)                                | 351 (39,0)              | 0,424  |
| Metformina                           | 22 (28,6)                     | 8 (22,9)                                 | 204 (22,7)              | 0,508  |
| Insulina                             | 14 (18,2)                     | 9 (25,7)                                 | 101 (11,3)              | 0,010  |
| iSGLT2                               | 25 (32,9)                     | 7 (20,0)                                 | 198 (22,1)              | 0,100  |
| An-GLP1                              | 2 (2,6)                       | 1 (2,9)                                  | 42 (4,7)                | 0,627  |
| Otro antidiabético oral              | 8 (10,7)                      | 7 (20,6)                                 | 95 (10,6)               | 0,213  |
| Inhibidor de la bomba de<br>protones | 71 (92,2)                     | 34 (97,1)                                | 797 (88,8)              | 0,200  |

An-GLP1: análogo del receptor del péptido similar al glucagón tipo 1; ARA-II: antagonistas del receptor de la angiotensina II; FA/FIA: fibrilación auricular o *flutter* auricular;

IECA: inhibidores de la enzima de conversión de la angiotensina; iSGLT2: inhibidores del cotransportador 2 de sodio-glucosa.

Los valores expresan n (%).

## Tabla 7 del material adicional

Eventos en el seguimiento

|                                       | IMPACT<br>TIMING-GO<br>(n = 990) | FA/FIA previo o<br>durante el<br>ingreso<br>(n = 109) | Sin FA/FIA<br>(n = 881) | p       |
|---------------------------------------|----------------------------------|-------------------------------------------------------|-------------------------|---------|
| <i>Evento principal combinado</i>     | 135 (13,6)                       | 26 (23,9)                                             | 109 (12,4)              | 0,001   |
| <i>Hospitalización cardiovascular</i> | 86 (8,7)                         | 16 (14,7)                                             | 70 (7,9)                | 0,019   |
| Infarto de miocardio no fatal         | 45 (4,5)                         | 6 (5,5)                                               | 39 (4,4)                | 0,610   |
| Ictus no fatal                        | 4 (0,4)                          | 0                                                     | 4 (0,5)                 | 0,481   |
| Insuficiencia cardiaca no fatal       | 26 (2,6)                         | 6 (5,5)                                               | 20 (2,3)                | 0,046   |
| Otros                                 | 11 (1,1)                         | 4 (3,7)                                               | 7 (0,7)                 | 0,097   |
| <i>Sangrado grave</i>                 | 37 (3,7)                         | 10 (9,2)                                              | 27 (3,1)                | 0,002   |
| BARC 3a                               | 24 (2,4)                         | 5 (4,6)                                               | 19 (2,1)                |         |
| BARC 3b                               | 7 (0,7)                          | 2 (1,8)                                               | 5 (0,4)                 |         |
| BARC 3c                               | 5 (0,5)                          | 2 (1,8)                                               | 3 (0,2)                 |         |
| BARC 4                                | 0                                | 0                                                     | 0                       |         |
| BARC 5                                | 1 (0,1)                          | 1 (0,9)                                               | 0                       |         |
| <i>Mortalidad total</i>               | 23 (2,3)                         | 9 (8,3)                                               | 14 (1,6)                | < 0,001 |
| Mortalidad cardiovascular             | 9 (0,9)                          | 3 (2,8)                                               | 6 (0,7)                 | 0,067   |

BARC: *Bleeding Academic Research Consortium*; FA/FIA: fibrilación auricular o *flutter* auricular.

Los valores expresan n (%).

**Tabla 8 del material adicional**

Modelo multivariado para el evento combinado de complicaciones durante el seguimiento

| Variable                                      | HR bruta (IC95%) | p       | HR ajustada (IC95%)       | p     |
|-----------------------------------------------|------------------|---------|---------------------------|-------|
| FA/FIA previos frente a sin FA/FIA            | 1,67 (0,97-2,83) | 0,067   | 1,02 (0,55-               | 0,957 |
| FA/FIA durante el ingreso frente a sin FA/FIA | 3,16 (1,69-5,86) | < 0,001 | 1,76)<br>1,95 (1,02-3,76) | 0,045 |
| Edad (por año)                                | 1,04 (1,02-1,05) | < 0,001 | 1,02 (1,01-1,05)          | 0,033 |
| Sexo femenino                                 | 1,60 (1,12-2,30) | 0,010   | 1,59 (1,09-2,31)          | 0,094 |
| Índice de masa corporal (por cada punto)      | 0,98 (0,95-1,03) | 0,484   |                           |       |
| Hipertensión arterial                         | 2,22 (1,42-3,45) | < 0,001 | 1,33 (0,83-2,13)          | 0,108 |
| Dislipemia                                    | 1,94 (1,30-2,90) | 0,001   |                           |       |
| Diabetes                                      | 1,61 (1,15-2,27) | 0,006   |                           |       |
| Tabaquismo                                    | 0,77 (0,55-1,08) | 0,133   |                           |       |
| IAM previo                                    | 2,07 (1,46-2,95) | < 0,001 | 1,44 (0,98-2,14)          | 0,066 |
| Insuficiencia cardiaca                        | 2,84 (1,64-4,95) | < 0,001 | 1,02 (0,44-1,67)          | 0,655 |
| Enfermedad vascular periférica                | 3,23 (2,18-4,79) | < 0,001 | 2,06 (1,29-3,30)          | 0,020 |
| Enfermedad cerebrovascular                    | 2,04 (1,21-3,44) | 0,007   |                           |       |
| Enfermedad renal crónica                      | 3,34 (2,29-4,86) | < 0,001 | 1,90 (1,09-2,66)          | 0,021 |
| Enfermedad pulmonar crónica                   | 1,17 (0,69-1,97) | 0,564   |                           |       |

|                                                                  |                   |         |                  |       |
|------------------------------------------------------------------|-------------------|---------|------------------|-------|
| Hemorragia grave previa                                          | 2,65 (1,17-6,01)  | 0,020   | 1,12 (0,44-2,90) | 0,808 |
| Situación de fragilidad o prefragilidad                          | 3,14 (2,06-4,79)  | < 0,001 |                  |       |
| IAMSEST al ingreso                                               | 0,69 (0,48-1,00)  | 0,051   |                  |       |
| Elevación transitoria del segmento ST                            | 0,55 (0,25-1,18)  | 0,122   |                  |       |
| PCR o arritmia ventricular sostenida previa a la coronariografía | 1,21 (0,17-8,68)  | 0,847   |                  |       |
| Killip-Kimball > I                                               | 2,98 (2,003-4,43) | < 0,001 |                  |       |
| Tiempo hasta la coronariografía                                  | 1,00 (1,00-1,01)  | 0,053   |                  |       |
| Pretratamiento con doble antiagregación                          | 0,86 (0,60-1,24)  | 0,423   |                  |       |
| Acceso femoral en la coronariografía                             | 2,05 (1,16-3,64)  | 0,014   |                  |       |
| Revascularización quirúrgica durante el ingreso                  | 0,43 (0,19-0,98)  | 0,047   | 0,40 (0,17-0,92) | 0,003 |
| Tratamiento antitrombótico triple                                | 1,45 (0,81-2,64)  | 0,214   |                  |       |
| Bloqueador beta                                                  | 0,89 (0,63-1,29)  | 0,561   |                  |       |
| IECA/ARA-II                                                      | 1,04 (0,72-1,50)  | 0,837   |                  |       |
| Antialdosterónicos                                               | 1,51 (0,86-2,69)  | 0,152   |                  |       |
| Sacubitrilo-valsartán                                            | 1,81 (0,89-3,70)  | 0,104   |                  |       |
| Amiodarona                                                       | 2,19 (0,86-6,81)  | 0,109   |                  |       |
| Digoxina                                                         | 0,99 (0,14-7,08)  | 0,992   |                  |       |
| Diurético del asa                                                | 2,87 (0,92-4,12)  | 0,089   |                  |       |
| Diurético tiacídico                                              | 0,92 (0,53-1,60)  | 0,774   |                  |       |
| Estatinas                                                        | 4,02 (0,56-28,71) | 0,166   |                  |       |
| Ezetimiba                                                        | 1,12 (0,79-1,58)  | 0,507   |                  |       |
| Metformina                                                       | 1,15 (0,79-1,70)  | 0,465   |                  |       |
| Insulina                                                         | 1,69 (1,31- 3,02) | 0,001   |                  |       |
| iSGLT2                                                           | 1,19 (0,81-1,75)  | 0,376   |                  |       |
| An-GLP1                                                          | 0,94 (0,42-2,14)  | 0,887   |                  |       |
| Inhibidor de la bomba de protones                                | 1,49 (0,78-2,84)  | 0,223   |                  |       |

AAS: ácido acetilsalicílico; An-GLP1: análogo del receptor de péptido similar al glucagón tipo 1; ARA-II: antagonistas del receptor de la angiotensina II; FA/FIA: fibrilación auricular o *flutter* auricular; HR: *hazard ratio*; IECA: inhibidores de la enzima de conversión de la angiotensina; iSGLT2: inhibidores del cotransportador 2 de sodio-glucosa.

**Figura 1 del material adicional.** Eventos extrahospitalarios de los pacientes con FA/FIA previa o durante el ingreso. FA/FIA: fibrilación auricular o *flutter* auricular; HR: *hazard ratio*.

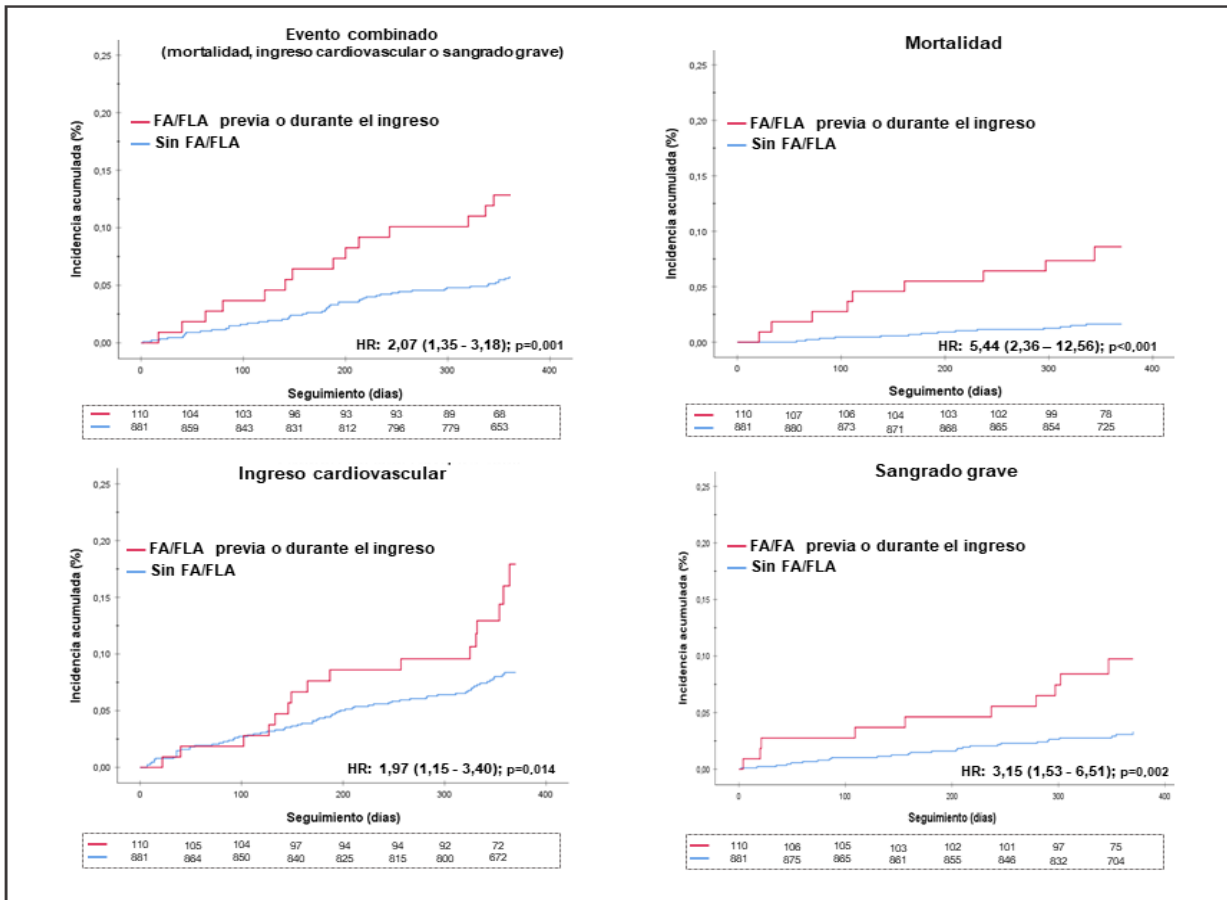

Supplement: mmc1 [file mmc1.pdf]
